# Supplementary material for: A CRISPR-based rapid DNA repositioning strategy and the early intranuclear life of HSV-1
Source: eLife. 2023 Sep 13;12:e85412. doi: 10.7554/eLife.85412 (PMC10522339; doi:10.7554/eLife.85412)
Supplement: Figure 1—figure supplement 1—source data 9. [file elife-85412-fig1-figsupp1-data9.xlsx]

## Sheet: Sheet1
supplementary figure 1-G		time(hr)	Hep2(dCas9-Emerin)+DOX			Hep2(dCas9-Emerin)-DOX			Hep2
		0	0.227	0.237	0.222	0.255	0.3	0.267	0.243	0.248	0.238
		24	0.473	0.479	0.48	0.644	0.661	0.688	0.66	0.642	0.657
		48	1.143	0.899	1.024	1.285	1.377	1.525	1.527	1.617	1.329
		72	2.115	1.859	2.003	2.38	2.703	2.84	2.067	2.131	2
		96	3.79	3.357	3.687	3.232	3.769	3.569	3.428	3.79	3.79
supplementary figure 1-I
	Plasmids								Total spots counted	Total nucleus counted			P value
		0s	Total	205	165	95			465	32
			Nuclear Peripheral	48	41	23			112
			Ratio	0.234146	0.248485	0.242105			0.24086
		10s	Total	307	107	253			667	40		10s VS 0s	5.37617e-06
			Nuclear Peripheral	214	70	169			453
			Ratio	0.697068	0.654206	0.667984			0.67916
		20s	Total	189	246	186			621	36		20s VS 0s	1.33505e-06
			Nuclear Peripheral	137	184	133			454
			Ratio	0.724868	0.747967	0.715054			0.731079
		40s	Total	102	194	285			581	35		40s VS 0s	2.37533e-07
			Nuclear Peripheral	80	155	230			465
			Ratio	0.784314	0.798969	0.807018			0.800344
		180s	Total	156	213	127			496	30		180s VS 0s	1.77246e-08
			Nuclear Peripheral	140	191	113			444
			Ratio	0.897436	0.896714	0.889764			0.895161
