# Supplementary material for: A CRISPR-based rapid DNA repositioning strategy and the early intranuclear life of HSV-1
Source: eLife. 2023 Sep 13;12:e85412. doi: 10.7554/eLife.85412 (PMC10522339; doi:10.7554/eLife.85412)
Supplement: Figure 1—source data 6. [file elife-85412-fig1-data6.xlsx]

## Sheet: Sheet1
Figure 1-F
	BAC								Total spots counted	Total nucleus counted			P value
		0s	Total	170	191	83	156		600	49
			Nuclear Peripheral	61	59	31	62		213
			Ratio	0.358824	0.308901	0.373494	0.397436		0.355
		10s	Total	56	102	188	197		543	30		10s VS 0s	0.000522607
			Nuclear Peripheral	32	52	119	112		315
			Ratio	0.571429	0.509804	0.632979	0.568528		0.58011
		20s	Total	104	133	161	127		525	30		20s VS 0s	7.33673e-05
			Nuclear Peripheral	87	114	111	94		406
			Ratio	0.836538	0.857143	0.689441	0.740157		0.773333
		40s	Total	79	98	215	97	177	666	37		40s VS 0s	1.01716e-05
			Nuclear Peripheral	55	82	192	78	149	556
			Ratio	0.696203	0.836735	0.893023	0.804124	0.841808	0.834835
		180s	Total	135	85	134	91	47	492	33		180s VS 0s	8.13088e-07
			Nuclear Peripheral	125	68	124	84	44	445
			Ratio	0.925926	0.8	0.925373	0.923077	0.93617	0.904472
		180s-Ctr sgRNA	Total	254	157	213			624	40		Ctr sgRNA VS 0s	0.0566036
			Nuclear Peripheral	82	45	62			189
			Ratio	0.322835	0.286624	0.29108			0.302885
Figure 1-H	telomere
										Total spots counted	Total nucleus counted			P value
		0h	Total	251	294	264	337	323	150	1619	30
			Nuclear Peripheral	82	61	63	81	71	32	390
			Ratio	0.326693	0.207483	0.238636	0.240356	0.219814	0.213333	0.240889
		1h	Total	263	283	277	342	303	119	1587	29		1h VS 0h	0.0452316
			Nuclear Peripheral	82	79	73	126	78	36	474
			Ratio	0.311787	0.279152	0.263538	0.368421	0.257426	0.302521	0.298677
		3h	Total	283	324	284	305	360	101	1657	29		3h VS 0h	0.000817839
			Nuclear Peripheral	112	109	118	139	111	50	639
			Ratio	0.39576	0.33642	0.415493	0.455738	0.308333	0.49505	0.385637
		6h	Total	304	322	293	322	302	177	1720	30		6h VS 0h	9.32212e-07
			Nuclear Peripheral	152	159	178	190	195	98	972
			Ratio	0.5	0.493789	0.607509	0.590062	0.645695	0.553672	0.565116
		24h	Total	255	275	286	299	324	133	1572	30		24h VS 0h	1.237e-08
			Nuclear Peripheral	180	214	190	220	251	111	1166
			Ratio	0.705882	0.778182	0.664336	0.735786	0.774691	0.834586	0.74173
		24h-Ctr sgRNA	Total	287	275	267	344	350		1523	27		Ctr sgRNA VS 0h	0.309849
			Nuclear Peripheral	76	54	54	83	57		324
			Ratio	0.264808	0.196364	0.202247	0.241279	0.162857		0.212738
