# Supplementary material for: A CRISPR-based rapid DNA repositioning strategy and the early intranuclear life of HSV-1
Source: eLife. 2023 Sep 13;12:e85412. doi: 10.7554/eLife.85412 (PMC10522339; doi:10.7554/eLife.85412)
Supplement: Figure 2—figure supplement 1—source data 1. — This zip archive contains source data for western blot in panel I, original data collected for statistical analysis in panel A, B, and K, qPCR data in panel H, I, L, M and N, virus titers in panel D, E and F, and processed images (TIF files) in panel B, G and J. Original fluorescence images are deposited on DRYAD (https://doi.org/10.5061/dryad.vmcvdncxd). [file elife-85412-fig2-figsupp1-data1.xlsx]

## Sheet: Sheet1
		hpi
supplementary figure 2-A		0.5hpi	0.28125	0.336207	0.271186
		1hpi	0.296875	0.32	0.226804
genomes at the edge%		1.5hpi	0.266667	0.245614	0.22093
		2hpi	0.294118	0.26087	0.276596
supplementary figure 2-B		number	distance(μm)
		1	0.376
		2	0.521
		3	0.347
		4	0.501
		5	0.439
		6	0.521
		7	0.491
		8	0.397
		9	0.748
		10	0.374
		11	0.417
		12	0.139
		13	0.737
		14	0.845
		15	0.376
		16	0.659
		17	0.878
		18	0.621
		19	0.589
		20	0.621
		21	0.521
		22	0.196
		23	0.165
		24	0.523
		25	0.329
		26	0.329
		27	0.188
		28	0.542
		29	0.491
		30	0.143
		31	0.246
		32	0.069
		33	0.44
		34	0.368
		35	0.347
		36	0.417
		37	0.202
		38	0.19
		39	0.469
		40	0.333
		41	0.246
		42	0.357
		43	0.299
		44	0.466
		45	0.26
		46	0.464
		47	0.501
		48	0.37
		49	0.369
		50	0.466
		51	0.655
		52	0.445
		53	0.536
		54	0.445
		55	0.347
		56	0.463
		57	0.333
		58	0.278
		59	0.417
		60	0.516
		61	0.347
		62	0.618
		63	0.363
		64	0.561
		65	0.607
		66	0.542
		67	0.56
		68	0.701
		69	0.521
		70	0.466
		71	0.814
		72	0.758
		73	0.529
		74	0.286
		75	0.637
		76	0.368
		77	0.368
		78	0.536
		79	0.513
		80	0.494
		81	0.786
		82	0.286
		83	0.748
		84	0.233
		85	0.405
		86	0.556
		87	0.393
		88	0.589
		89	0.491
		90	0.368
		91	0.222
		92	0.42
		93	0.246
		94	0.491
		95	0.369
		96	0.174
		97	0.32
		98	0.379
		99	0.397
		100	0.448
supplementary figure 2-D		Ctr sgRNA			HSV-1 sgRNA1			HSV-1 sgRNA2			HSV-1 sgRNA3			HSV-1 sgRNA4			HSV-1 sgRNA5
		220000000	212000000	236000000	20000000	12000000	24000000	40000000	32000000	36000000	16000000	24000000	32000000	88000000	80000000	100000000	48000000	44000000	32000000
	HSV-1 sgRNA VS Ctr sgRNA	P value
	HSV-1 sgRNA1	<0.0001
	HSV-1 sgRNA2	<0.0001
	HSV-1 sgRNA3	<0.0001
	HSV-1 sgRNA4	0.000128487
	HSV-1 sgRNA5	<0.0001
supplementary figure 2-E			Control sgRNA			HSV-1 sgRNA
		GFP	23000000	19666667	21000000	20333333	21666667	23333333
		dCas9	16333333	17666667	18333333	11666667	9666667	9000000
		dCas9-Emerin	16666667	14333333	13000000	524718	796349	579385
											HSV-1 sgRNA VS Ctr sgRNA	P value
supplementary figure 2-F			dCAs9			dCas9-Emerin
		sgRNA1	11111111	10925926	10740741	518518	851852	592593		sgRNA1		<0.0001
		sgRNA2	10185185	10481481	10148148	1666667	1703704	2259259		sgRNA2		<0.0001
supplementary figure 2-H		hpi	MOI 20 HSV-1 sgRNA			MOI 20 Ctr sgRNA
rel.ICP27/GAPDH		0	1235.67	1284.65	1064.45	6836.37	7696.09	7622.28
		0.17	1551.49	1268.55	1248.02	5964.78	5739.01	5857.16
		0.33	1472.65	1609.19	1594.9	4994.98	4011.32	4252.82
		0.5	1476.17	1544.19	1646.3	4210.17	4079.97	3467.22
		1	6091.82	5730.56	6034.92	88611.1	77557.9	80433.7
		1.5	8136.96	7590.35	7303.3	328809	335911	346569
		2	234344	235762	235468	7.9133e+06	7.59258e+06	7.91631e+06
		3	1.40211e+06	1.58771e+06	1.44493e+06	2.6139e+07	2.56283e+07	2.60894e+07
												HSV-1 sgRNA VS Ctr sgRNA	P value
supplementary figure 2-I		Exp1		HSV-1 sgRNA			control sgRNA
			1 hpi	0.101193	0.105866	0.102771	0.108535	0.122767	0.116666		1 hpi		0.0429872
			2 hpi	0.124409	0.121233	0.130523	0.12175	0.132096	0.139534		2 hpi		0.380917
		Exp2		HSV-1 sgRNA			control sgRNA
			1 hpi	0.134887	0.134556	0.12342	0.111985	0.120728	0.110458		1 hpi		0.0285482
			2 hpi	0.232152	0.219053	0.225998	0.200759	0.186193	0.198156		2 hpi		0.0063762
supplementary figure 2-K		hpi	Ctr sgRNA			HSV-1 sgRNA
		4	0.3864	0.36	0.3812	0	0	0
		6	0.92	0.86	0.82	0.2191	0.2244	0.1904
		8	0.9746	0.9725	0.9829	0.4828	0.5654	0.4936
supplementary figure 2-L			ICP27
		H3K4ME3	79.7542	76.5162	87.111
		H3K9AC	32.2715	39.4019	41.8604
		H3K9ME3	74.1826	82.0418	95.8901
		H4K20ME3	52.4192	45.0386	41.6696
		H3K27ME3	44.2436	46.0324	36.4828
			GAODH
		H3K4ME3	34.7053	36.5455	44.9557
		H3K9AC	21.854	24.0564	21.4006
		H3K9ME3	40.1427	37.1885	31.9106
		H4K20ME3	28.4051	39.8266	33.1818
		H3K27ME3	22.3118	21.5086	15.6893
supplementary figure 2-M
	ICP27		HSV-1 sgRNA			Ctr sgRNA						P value
		5min	0.103497	0.091832	0.069402	0.067433	0.063501	0.067967			5min	0.0956042
		15min	0.107723		0.152967	0.117827	0.124991	0.126692			15min	0.704975
		30min	0.099394	0.116092	0.146425	0.103675	0.130683	0.122452			30min	0.920074
		60min	0.394149	0.422298	0.387508		0.278385	0.269292			60min	0.00290365
	ICP8		HSV-1 sgRNA			Ctr sgRNA
		5min	0.0714	0.07127	0.077765	0.066339	0.065143	0.054425			5min	0.0573144
		15min	0.134962	0.131036	0.145543	0.147405		0.171481			15min	0.12589
		30min	0.087765	0.096653	0.094949	0.100812	0.088658	0.110642			30min	0.374012
		60min	0.238421	0.260246	0.265826	0.169314	0.175656	0.199635			60min	0.00416996
			HSV-1 sgRNA			Ctr sgRNA
	VP16	5min	0.025877	0.014184	0.022076	0.009522	0.013376	0.008861			5min	0.0528877
		15min	0.018178	0.026207	0.030852	0.007171	0.026519	0.051271			15min	0.819292
		30min	0.024747	0.034345	0.03463	0.026878	0.044233	0.021128			30min	0.951683
		60min	0.168163	0.137564	0.077584	0.067151	0.013136	0.074658			60min	0.0817708
supplementary figure 2-N
			HSV-1 sgRNA			Ctr sgRNA
		DMSO	195448	228293	191298	1210861	1119825	1252231
		VPA	185238	167292	163783	1314187	1317339	1363600
		TSA	207708	205145	197707	1964914	1725524	1969452
		FK228	194881	189795	188544	1793804	1882249	1856360
		NaB	111577	111310	114828	1582063	1676231	1635249
			HSV-1 sgRNA/Ctr sgRNA						P value
		DMSO	0.068403	0.068239	0.070396
		VPA	0.105676	0.102918	0.10224				<0.0001
		TSA	0.110095	0.108736	0.104794				0.0019
		FK228	0.139098	0.125622	0.122987				0.000280508
		NaB	0.16365	0.191151	0.160175				0.000473755
