# Supplementary material for: A CRISPR-based rapid DNA repositioning strategy and the early intranuclear life of HSV-1
Source: eLife. 2023 Sep 13;12:e85412. doi: 10.7554/eLife.85412 (PMC10522339; doi:10.7554/eLife.85412)
Supplement: Figure 2—source data 1. — This zip archive contains source data for western blot in panel E, original viral titers in panel A and C, qPCR data in panel D, F, G, and H, and processed images (TIF files) in panel B. Original confocal images in panel B are deposited on DRYAD (https://doi.org/10.5061/dryad.vmcvdncxd). [file elife-85412-fig2-data1.xlsx]

## Sheet: Sheet1
figure 2-A
	hpi	HSV-1 sgRNA			Ctr sgRNA
	0	17200	18400	18800	56800	62400	58400
	1	36000	20000	28000	88000	76000	72000
	2	25600	22000	20800	52400	58400	54800
	3	44000	48000	40000	40000	72000	44000
	5	12000	8000	16000	132000	148000	116000
	7	20000	24000	32000	760000	840000	960000
	18	8800000	7600000	6800000	38400000	34000000	40000000
	20	12800000	10000000	15600000	51600000	52400000	49200000
	24	10800000	10400000	9200000	51200000	47600000	44000000
	48	10400000	8800000	9200000	48000000	40000000	32000000
Figure 2-C	MOI	Ctr sgRNA			HSV-1 sgRNA
	0.1	7200000	8800000	9600000	100000	164000	104000
	1	55600000	66400000		7200000	4800000	8000000
	5	132000000	76000000	136000000	16400000	26000000	19600000
	20	312000000	296000000	252000000	38400000	36000000	40800000
Figure 2-D		hpi	HSV-1 sgRNA			Ctr sgRNA
	ICP27	0	8309.93	8388.73	8836.88	23086.8	17313.6	19110
		0.17	1694.22	1477.93	1939.87	7175.96	7109.98	6009.62
		0.5	944.462	874.138	683.93	3129.62	2556.52	2330.89
		1	830.345	991.987	816.623	19599.5	21274.4	20856.7
		2	16522.2	15576.1	14753.8	647590	654256	650631
		3	59553.8	51289.5	59299.3	1.83966e+06	1.79963e+06	1.98422e+06
		5	495017	456887	467972	6.04217e+06	5.98203e+06	5.94999e+06
		9	3.19908e+06	2.87453e+06	2.62207e+06	1.88827e+07	1.83693e+07	1.63689e+07
		hpi	+sgRNA			-sgRNA
	TK	0	8055.55	9396.78	8130.36	28189.9	29500.8	25166.2
		0.17	372.127	371.441	492.528	1966.08	2242.05	2682.49
		0.5	440.459	550.7	354.298	1827.32	1644.37	1087.75
		1	271.284	315.224	144.431	1673.48	1839.2	2074.85
		2	518.914	532.818	553.997	17669.5	19715.7	21218.2
		3	5479.37	4766.79	4212.58	3.79645e+06	4.18091e+06	5.10302e+06
		5	996591	1.02806e+06	1.01665e+06	3.59789e+07	3.77017e+07	3.74162e+07
		9	1.60352e+07	1.58022e+07	1.61684e+07	1.05388e+08	9.89372e+07	1.17096e+08
	vp16	hpi	+sgRNA			-sgRNA
		0	26392.1	27077.4	28528.2	77422.4	82315.4	75779.7
		0.17	3986.61	4024.83	3644.64	19981.3	20767.4	16626.2
		0.5	3547.13	3895.1	4105.74	16734.8	16540.5	15728.7
		1	2058.97	2801.23	2570.88	16357.6	21824.4	23114.6
		2	4082.81	5820.98	5265.72	44191	46851.8	42169.4
		3	9378.48	7323.9	10375.1	513010	568449	467740
		5	157987	149713	132308	4.79823e+06	4.60909e+06	3.72672e+06
		9	3.7425e+06	3.0169e+06	2.78437e+06	9.16075e+07	8.13754e+07	8.03341e+07
Figure 2-F
	ICP27		HSV-1 sgRNA			Ctr sgRNA						P value
		H3K4me3	0.914396	1.02515	1.03758	1.15687	1.15975	1.16046			H3K4me3	0.0131114
		H3K9AC	1.38278	1.27649	1.24505	1.72346	1.89325				H3K9AC	0.00883669
		H4K20me3	1.04463	1.0363	1.1604	0.795676	0.831857	0.808734			H4K20me3	0.00292595
		H3K9me3	0.995665	1.14771	1.08303	0.937896	0.927088	0.912278			H3K9me3	0.0285395
		H3K27me3	0.619687	0.710713	0.63579	0.579313	0.587714	0.576885			H3K27me3	0.0585577
	ICP8		HSV-1 sgRNA			Ctr sgRNA
		H3K4me3	0.009227	0.009436	0.007984	0.01345	0.013599	0.012867			H3K4me3	0.000938497
		H3K9AC	0.058421	0.065379	0.077348	0.30736	0.349099	0.328821			H3K9AC	<0.0001
		H4K20me3	0.006056	0.008092	0.007836	0.004456	0.002343	0.003184			H4K20me3	0.0107501
		H3K9me3	0.008933	0.01278	0.014209	0.004783	0.003777	0.006625			H3K9me3	0.0178745
		H3K27me3	0.170723	0.158593	0.235229	0.155824		0.15316			H3K27me3	0.352923
	VP16		HSV-1 sgRNA			Ctr sgRNA
		H3K4me3	0.00393	0.002775	0.004236	0.012459	0.006017	0.010898			H3K4me3	0.0366909
		H3K9AC	0.033558	0.046756	0.035143	0.274258	0.305079	0.275805			H3K9AC	<0.0001
		H4K20me3	0.002499	0.001989	0.001161	0.000103	0.00037	0.000617			H4K20me3	0.0219089
		H3K9me3	0.003053	0.003693	0.004701	0.001533	0.001479	0.00053			H3K9me3	0.0104601
		H3K27me3	0.095779	0.088465	0.106474	0.139465	0.145022	0.179688			H3K27me3	0.0132334
Figure 2-G
	anti-H3K9ME3
	ICP27	hpi	HSV-1 sgRNA			Ctr sgRNA						P value
		5min	0.503848	0.570706	0.548431	0.862449	0.936966	0.728269			5min	0.0092999
		15min	0.784236	0.833949	0.699372	0.411039	0.722658	0.594991			15min	0.117373
		30min	0.94521	0.801235	0.895245	0.486921	0.618097	0.651519			30min	0.0108461
		60min	1.20245	1.29159	1.2942	0.356224	0.557484	0.551815			60min	0.000440499
		hpi	HSV-1 sgRNA			Ctr sgRNA
	ICP8	5min	0.586659	0.61362	0.66655	0.538769	0.53178	0.519762			5min	0.0187368
		15min	0.488845	0.574099	0.576978	0.147783	0.318505	0.232356			15min	0.00535859
		30min	0.512166	0.638661	0.615584	0.209625	0.235658	0.202989			30min	0.000749141
		60min	1.17861	1.20156	1.05295	0.20675	0.197473	0.224759			60min	<0.0001
		hpi	HSV-1 sgRNA			Ctr sgRNA
	VP16	5min	0.31278	0.282043	0.253583	0.289796	0.235163	0.233707			5min	0.300179
		15min	0.314435	0.33675	0.280094	0.057219	0.096924	0.069713			15min	0.000309141
		30min	0.305582	0.464798	0.337157	0.108495	0.083653	0.083306			30min	0.004938
		60min	0.949658	1.0158	0.703369	0.115978	0.12359	0.141483			60min	0.0013257
Figure 2-H
rel.ICP27/GAPDH	hpi	HSV-1+NaB +sgRNA			HSV-1+NaB +Ctr sgRNA			HSV-1 +sgRNA			HSV-1 +Ctr sgRNA
	0	39.662	10.545	8.703	37.969	75.743	75.923	48.83	10.16	26.29	81.79	55.5	57.22
	0.25	80.379	80.547	62.827	80.211	65.856	84.49	16.42	31.6	38.97	73.49	59.83	101.51
	0.5	52.808	34.298	69.156	50.128	134.817	66.722	33.89	19.43	26.96	76.79	88.3	68.58
	1	212.193	212.911	242.618	1352.19	1522.48	1529.52	48.7	37.7	39.62	660.03	717.69	775.23
	2	9914.3	9375.22	9018.66	63622.7	62400.4	68709.3	2167.47	2456.68	2614.55	37520.6	34813.4	39423.5
	3	21872.2	27450.2	27185.8	336473	331308	321161	8644.57	7628.7	8979.05	114091	108162	102635
