# Supplementary material for: A CRISPR-based rapid DNA repositioning strategy and the early intranuclear life of HSV-1
Source: eLife. 2023 Sep 13;12:e85412. doi: 10.7554/eLife.85412 (PMC10522339; doi:10.7554/eLife.85412)
Supplement: Figure 3—figure supplement 1—source data 4. [file elife-85412-fig3-figsupp1-data4.xlsx]

## Sheet: Sheet1
supplementary figure 3-D	electroporation time(hpi)	dCas9+Ctr sgRNA			dCas9+HSV-1 sgRNA				P value
	0	21428.6	20357.1	22142.9	19642.9	18571.4	18928.6		0.0203643
	0.5	33571.4	34285.7	32142.9	32500	31071.4	30357.1		0.0855646
	1	39285.7	53571.4	42857.1	46428.6	35714.3	32142.9		0.304559
	2	22500	24285.7	23214.3	23928.6	25714.3	24642.9		0.12343
