# Supplementary material for: A CRISPR-based rapid DNA repositioning strategy and the early intranuclear life of HSV-1
Source: eLife. 2023 Sep 13;12:e85412. doi: 10.7554/eLife.85412 (PMC10522339; doi:10.7554/eLife.85412)
Supplement: Figure 3—source data 3. [file elife-85412-fig3-data3.xlsx]

## Sheet: Sheet1
Figure 3-D								Total spots counted	Total nucleus counted			P value
	0.5hpi HSV-1 sgRNA	Total	217	205	206	195	202	1025	155		0.5hpi HSV-1 sgRNA VS 0.5hpi Ctr sgRNA	7.76758e-08
		Nuclear Peripheral	176	165	172	170	152	835
		Ratio	0.81106	0.804878	0.834951	0.871795	0.752475	0.814634
	0.5hpi Ctr sgRNA	Total	226	216	223	207	395	1267	250
		Nuclear Peripheral	81	68	83	70	160	462
		Ratio	0.358407	0.314815	0.372197	0.338164	0.405063	0.364641
	1 hpi HSV-1 sgRNA	Total	214	207	214	210	222	1067	186		1hpi HSV-1 sgRNA VS 0.5hpi Ctr sgRNA	1.76355e-06
		Nuclear Peripheral	165	174	153	178	158	828
		Ratio	0.771028	0.84058	0.714953	0.847619	0.711712	0.776007
	1hpi Ctr sgRNA	Total	212	228	221	210	300	1171	202
		Nuclear Peripheral	62	75	60	84	101	382
		Ratio	0.292453	0.328947	0.271493	0.4	0.336667	0.326217
	2 hpi HSV-1 sgRNA	Total	206	217	215	217	228	1083	175		2hpi HSV-1 sgRNA VS 0.5hpi Ctr sgRNA	2.12801e-08
		Nuclear Peripheral	138	148	149	150	165	750
		Ratio	0.669903	0.682028	0.693023	0.691244	0.723684	0.692521
	2hpi Ctr sgRNA	Total	213	219	217	215	215	1079	230
		Nuclear Peripheral	70	58	73	75	70	346
		Ratio	0.328638	0.26484	0.336406	0.348837	0.325581	0.320667
Figure 3-E			Ctr sgRNA			HSV-1 SgRNA						P value
		0	480000	320000	440000	120000	80000	120000			0	0.00355229
		0.5	156000	128000	140000	76000	80000	88000			0.5	0.00246477
		1	280000	160000	240000	920000	720000	1120000			1	0.00455718
		2	160000	440000	360000	640000	720000	600000			2	0.0210917
Figure 3-F																	0hpi	P value
	0hpi electroporate	hpi	0hpi+HSV-1 SgRNA			0hpi+Ctr sgRNA										0		0.882028
		0	259.259	481.481	407.407	370.37	444.444	296.296								4		0.152318
		4	11111.1	7407.41	18518.5	22222.2	33333.3	14814.8								8		0.0161301
		8	3703.7	7407.41	3703.7	14814.8	11111.1	18518.5								12		0.00195569
		12	22222.2	18518.5	29629.6	62963	51851.8	55555.6
	0.5hpi electroporate	hpi	0.5hpi+HSV-1 SgRNA			0.5hpi+Ctr sgRNA			0hpi+HSV-1 SgRNA			0hpi+Ctr sgRNA					0.5hpi
		0	370.37	370.37	333.333	333.333	296.296	259.259	259.259	481.481	407.407	370.37	444.444	296.296		0		0.0667665
		4	14814.8	18518.5	14814.8	18518.5	37037	44444.4	11111.1	7407.41	18518.5	22222.2	33333.3	14814.8		4		0.0912602
		8	7407.41	3703.7	3703.7	7407.41	11111.1	14814.8	3703.7	7407.41	3703.7	14814.8	11111.1	18518.5		8		0.0667665
		12	22222.2	25925.9	14814.8	55555.6	59259.3	44444.4	22222.2	18518.5	29629.6	62963	51851.8	55555.6		12		0.00435683
	1hpi electroporate	hpi	1hpi+HSV-1 SgRNA			1hpi+Ctr sgRNA			0hpi+HSV-1 SgRNA			0hpi+Ctr sgRNA					1hpi
		0	222.222	370.37	407.407	481.481	333.333	407.407	259.259	481.481	407.407	370.37	444.444	296.296		0		0.355233
		4	70370.4	74074.1	66666.7	22222.2	29629.6	33333.3	11111.1	7407.41	18518.5	22222.2	33333.3	14814.8		4		0.000424224
		8	40740.7	29629.6	40740.7	11111.1	18518.5	3703.7	3703.7	7407.41	3703.7	14814.8	11111.1	18518.5		8		0.0101637
		12	125926	118518	129630	33333.3	55555.6	29629.6	22222.2	18518.5	29629.6	62963	51851.8	55555.6		12		0.000617853
	2hpi electroporate	hpi	2hpi+HSV-1 SgRNA			2hpi+Ctr sgRNA			0hpi+HSV-1 SgRNA			0hpi+Ctr sgRNA					2hpi
		0	444.444	259.259	333.333	444.444	407.407	296.296	259.259	481.481	407.407	370.37	444.444	296.296		0		0.623958
		4	14814.8	11111.1	11111.1	14814.8	25925.9	18518.5	11111.1	7407.41	18518.5	22222.2	33333.3	14814.8		4		0.101192
		8	14814.8	7407.41	11111.1	11111.1	22222.2	18518.5	3703.7	7407.41	3703.7	14814.8	11111.1	18518.5		8		0.189004
		12	59259.3	51851.8	44444.4	44444.4	62963	48148.2	22222.2	18518.5	29629.6	62963	51851.8	55555.6		12		1
