# Supplementary material for: A CRISPR-based rapid DNA repositioning strategy and the early intranuclear life of HSV-1
Source: eLife. 2023 Sep 13;12:e85412. doi: 10.7554/eLife.85412 (PMC10522339; doi:10.7554/eLife.85412)
Supplement: Figure 4—figure supplement 1—source data 1. — This zip archive contains source data for western blot in panel F, original virus titers in panels B, C, D, and G, qPCR data in panels A and E (https://doi.org/10.5061/dryad.vmcvdncxd). [file elife-85412-fig4-figsupp1-data1.xlsx]

## Sheet: Sheet1
supplementary figure 4-A		hpi	PAA			DMSO
		0	25085.9	25051.4	23906.4	24086.5	25004.4	20378
		3	20210.8	20285.5	21757	23937.4	26255	21920.2
		6	19992.7	19478.5	22956.3	34533.8	34604.8	36880.8
		9	26498.7	21707.2	26443.7	41152.4	42084.4	42747.7
		12	24000	23601.7	25650	51297.8	47059.9	53167.9
		24	26438.5	26553.6	24400.1	1.27494e+06	1.03136e+06	945954
																P value	P value
supplementary figure 4-B		HSV-1 sgRNA +ICP0			Ctr sgRNA+ICP0			HSV-1 sgRNA +GFP			Ctr sgRNA+GFP					ICP0	GFP
	Exp1	20000	26666.7	26666.7	10000	16666.7	13333.3	170000	183333	190000	43333.3	46666.7	43333.3		Exp1	0.0194418	<0.0001
	Exp3	16428.6	14642.9	13928.6	12142.9	11071.4	9285.71	35714.3	36785.7	38928.6	11071.4	12857.1	13214.3		Exp3	0.020279	<0.0001
	Exp2	13214.3	13928.6	16071.4	8928.57	6785.71	8214.29	203571	196429	217857	53571.4	57142.9	46428.6		Exp2	0.0037951	<0.0001
supplementary figure 4-C	MOI	HSV-1 sgRNA			Ctr sgRNA
	0.01	8	12	12	24	20	32
	0.1	2800	2000	4400	64000	84000	44000
	1	8000	16000	20000	80000	72000	108000
	5	120000	120000	144000	480000	640000	520000
supplementary figure 4-D	hpi	HSV-1 sgRNA			Ctr sgRNA
	0	64000	60000	80000	124000	108000	100000
	2	36000	24000	32000	124000	100000	108000
	4	48000	36000	56000	96000	76000	60000
	6	36000	44000	48000	96000	76000	84000
	8	52000	76000	64000	160000	80000	160000
	12	24000	24000	44000	72000	52000	64000
	24	80000	40000	84000	320000	200000	520000
	48	160000	320000	440000	1240000	1200000	880000
supplementary figure 4-E	ICP27	hpi	HSV-1 sgRNA			Ctr sgRNA
ΔICP0 virus infected		0	461.1	243.81	338.5	518.18	597.26	727.45
		0.17	230.52	99.92	190.17	340.86	172.03	361.9
		0.5	429.32	591.589	455.597	475.109	383.697	371.346
		1	266.21	210.61	146.52	1667.98	1613.37	1520.3
		2	1559.41	1441.33	1359.83	17678.1	16745.7	18375.8
		3	9435.74	8624.5	9305.44	57005.2	58314.9	60784.4
		5	63806.1	64436.7	66387.7	428116	459809	461012
		9	865139	851144	860781	3.65365e+06	3.31277e+06	3.70918e+06
	TK	hpi	HSV-1 sgRNA			Ctr sgRNA
		0	332.01	155.53	104.14	288.64	133.53	169.04
		0.17	151.89	107.71	100.43	162.91	119.57	167.84
		0.5	229.857	236.832	270.37	138.05	152.761	148.523
		1	51.42	19.9	75.85	76.68	127.16	133.63
		2	63.45	120.35	95.96	66.89	145.11	116.38
		3	197.41	170.34	118.01	1292.25	1009.5	1309.43
		5	922.6	882.48	1444.51	34382.3	35952.3	33727.5
		9	103313	102886	107290	1.34557e+06	1.3617e+06	1.0551e+06
	VP16	hpi	HSV-1 sgRNA			Ctr sgRNA
		0	981.42	466.58	494.13	1188.26	1372.44	1363.68
		0.17	857.57	657.36	782.31	1636.18	1174.06	1535.77
		0.5	2064.91	1780.45	1832.08	1384.79	1468.17	1661.94
		1	448.39	675.21	354.4	1493.5	1258.19	1198.07
		2	431.4	295.58	565.85	1380.27	1183	1039.77
		3	372.18	563.74	408.85	1280.52	1884.26	1728.76
		5	750.02	962.98	1438.01	19102.5	19663.9	20176.7
		9	48536.5	51182.4	50429.4	411052	394634	363136
supplementary figure 4-G		HSV-1 sgRNA			Ctr sgRNA						P value
	ICP0	50000	30000	43333.3	16666.7	26666.7	20000			ICP0	0.0383063
	GFP	14333.3	16000	15000	5666.67	6333.33	5333.33			GFP	<0.0001
