# Supplementary material for: A CRISPR-based rapid DNA repositioning strategy and the early intranuclear life of HSV-1
Source: eLife. 2023 Sep 13;12:e85412. doi: 10.7554/eLife.85412 (PMC10522339; doi:10.7554/eLife.85412)
Supplement: Figure 4—source data 1. — This zip archive contains source data for western blot in panels B and D, qPCR data in panels A, C, and I, virus titers in panels F, G, and H, and processed images (TIF files) in panel E. Original images in panel E are deposited on DRYAD (https://doi.org/10.5061/dryad.vmcvdncxd). [file elife-85412-fig4-data1.xlsx]

## Sheet: Sheet1
Figure 4-A		hpi	HSV-1 sgRNA			Ctr sgRNA
	ICP27	1	565542	581677	585376	386027	626531	596213
		1.5	505332	682301	602412	541332	595462	600003
		2	723762	715029	735940	590710	602717	584040
		2.5	505311	660709	714296	990864	813045	1122645
		3	3.1951e+06	2.6168e+06	3.18949e+06	2.30013e+06	2.30015e+06	2.27246e+06
		4	6.5238e+06	4.97402e+06	7.10119e+06	2.73773e+06	3.88518e+06	3.85431e+06
		5	1.32709e+07	1.42813e+07	1.31232e+07	4.16735e+06	4.3687e+06	4.5264e+06
		7	1.84352e+07	1.75341e+07	2.00444e+07	5.83781e+06	6.09495e+06	6.17399e+06
		9	1.68325e+07	1.64042e+07	1.58634e+07	5.90334e+06	6.00493e+06	6.3857e+06
		hpi	HSV-1 sgRNA			Ctr sgRNA
	ICP0	1	29461.7	29561.7		48474.2	51430
		1.5	41907.6	44966.9	56563.4	26486.5	27303.1	24928
		2	56046.1	51976	64090	34077	36909.1	36813.4
		2.5		80298.3	93383.2	71564.8	99517	71596.2
		3	348712	303492	297662	231211	212039	210847
		4	667052	505353	519700	525241	530024	447871
		5	761866	771985	842399	499619	440898	494373
		7	1.1703e+06	1.19706e+06		536758	535986	527675
		9	2.27198e+06	1.44268e+06	1.88294e+06	576087	648941	778276
		hpi	HSV-1 sgRNA			Ctr sgRNA
	TK	1	1713.03	992.998	1137.21	983.176	969.522	1121.16
		1.5	958.078	1607.32	1183.93	791.912	904.167	1264.47
		2	1240.05	1425.97	1947.05	2502.15	1741.9	1785.18
		2.5	4454.58	5820.52	4319.47	3946.02	3990.01	4705.19
		3	36045.2	43037.6	42702.7	9671.41	8663.24	13144.5
		4	475246	494871	457088	31751.4	31012.1	32404.3
		5	1.79058e+06	1.86289e+06	1.65323e+06	99442.1	102909	100948
		7	3.29008e+06	3.41775e+06	3.34098e+06	208538	206240	210636
		9	2.82223e+06	2.6721e+06	2.93219e+06	337267	209912	347844
		hpi	HSV-1 sgRNA			Ctr sgRNA
	VP16	1	1499.9	1631.39	1731.74	1742.38	1247.55	1763.72
		1.5	2744.51	3027.6	2515.45	1070.66	1626.32	1200.43
		2	3814.1	4573.01	4120.65	2651.28	2414.82	2296.27
		2.5	7495.88	6702.23	7604.25	3978.32	4302.83	3319.09
		3	28823.2	30745.2	31594.1	10344.3	11456.9	11711.9
		4	192417	148740	200737	30901.9	32348	28898.1
		5	695355	731513	737563	107081	112381	108953
		7	3.99755e+06	4.06037e+06	3.99597e+06	309265	333507	294260
		9	7.04629e+06	8.76864e+06	7.11559e+06	494917	495767	436964
Figure 4-C		hpi	HSV-1 sgRNA			Ctr sgRNA			PAA+HSV-1 sgRNA			PAA+Ctr sgRNA
	TK	1	25.9102	25.7157	30.8666	27.0477	35.7848	26.4748	96.8068	59.4652	114.437	22.5307	27.0181	26.8419
		3	234.254	233.936	212.899	50.6903	57.4437	61.0689	76.9676	56.1048	68.6664	26.4118	34.8934	42.0844
		5	4351.08	5147.09	5000.95	215.336	276.423	259.047	930.107	926.679	900.359	73.5526	81.6662	77.6167
		9	28904.4	27294.3	27737.1	949.486	1217.59	1238.11	3455.89	3815.82	3323.59	282.604	290.604	280.186
	VP16	hpi	HSV-1 sgRNA			Ctr sgRNA			PAA+HSV-1 sgRNA			PAA+Ctr sgRNA
		1	16.4248	16.5102	15.3227	16.8544	18.324	0.64632	39.1095	15.335	7.26249	48.0756	30.5759	36.3791
		3	155.67	152.754	175.355	84.0867	80.6371	79.3882	43.9613	35.8903	36.058	46.4034	39.2018	46.6251
		5	757.727	760.985	752.197	124.282	144.132	135.547	393.103	378.105	338.682	51.7634	44.7203	50.6968
		9	5697.32	6016.47	5447.16	546.787	534.877	490.499	756.102	623.733	682.156	169.187	153.908	178.344
Figure 4-F												P value
			Ctr sgRNA			HSV-1 SgRNA
		0	26428.6	30000	29642.9	13928.6	12857.1	15357.1			0	0.000406297
		0.5	36071.4	37142.9	36428.6	21071.4	20357.1	18928.6			0.5	<0.0001
		1	32142.9	39285.7	46428.6	60714.3	50000	53571.4			1	0.0406421
		2	20000	21428.6	21785.7	20357.1	24642.9	22142.9			2	0.389296
Figure 4-G			HSV-1 sgRNA +ICP0			Ctr sgRNA+ICP0			HSV-1 sgRNA +GFP			Ctr sgRNA+GFP
		Exp1	20000	26666.7	26666.7	10000	16666.7	13333.3	170000	183333	190000	43333.3	46666.7	43333.3
		Exp3	16428.6	14642.9	13928.6	12142.9	11071.4	9285.71	35714.3	36785.7	38928.6	11071.4	12857.1	13214.3
		Exp2	13214.3	13928.6	16071.4	8928.57	6785.71	8214.29	203571	196429	217857	53571.4	57142.9	46428.6
			ICP0			GFP						P value
	fold change		1.83333	1.80597	1.38461	4.075	3.93182	3			fold change	0.00556342
												P value
			Ctr sgRNA			HSV-1 SgRNA
Figure 4-H		0.5	240000	320000	360000	160000	80000	200000			0.5	0.0326779
		1	40000	120000	200000	880000	840000	1000000			1	0.000295196
		2	200000	320000	360000	600000	840000	640000			2	0.0106366
Figure 4-I	TK	hpi	+HSV-1 sgRNA			+Ctr sgRNA
		0	26.4862	82.3304	166.811	43.3845	45.5081	65.1973
		0.5	57.1711	15.7438	97.2761	67.0562	135.849	171.6
		1	489.454	152.125	124.515	124.65	113.802	93.5761
		1.5	159.459	231.189	312.228	712.445	356.882	571.728
		2	273.589	390.716	541.032	480.514		1491.84
		3	792.676	656.473	1389.77	2650.57	2373.95	725.686
		4	3740.98	5452.95	4238.98	1315.43	1937.51
		6	27678.4	32414.9	33082.6	5321.56	4967.25
		8	92895.1	86519.6	81233.6	19356.4	24172.6	11232.2
	VP16	hpi	+HSV-1 sgRNA			+Ctr sgRNA
		0	555.064	122.638	162.674	277.054	137.186	334.583
		0.5	402.051	150.475	442.386	226.459	277.318	102.436
		1	141.595	195.81	397.048	230.405	411.001	175.757
		1.5	368.577	1168.16	1026.73	595.437	383.779	515.269
		2	1233.22	729.368	316.806	3770.78	1833.26	535.643
		3	792.676	656.473	1389.77	1454.34	1117.32	812.714
		4	9190.19	10211.4	16383.3	2693.83	2782.69	1910.31
		6	72574.5	79496.4	89279.1	10068.5	8142.27	5233.08
		8	192206	189848	181397	44498.3	37580.2	28110.3
