# Supplementary material for: A CRISPR-based rapid DNA repositioning strategy and the early intranuclear life of HSV-1
Source: eLife journal article supplement (doi:10.7554/elife.85412), 2023-09-13

Emerin Cyto

dCas9-Emerin cyto

Emerin Nu

dCas9-Emerin Nu

Anti-Flag

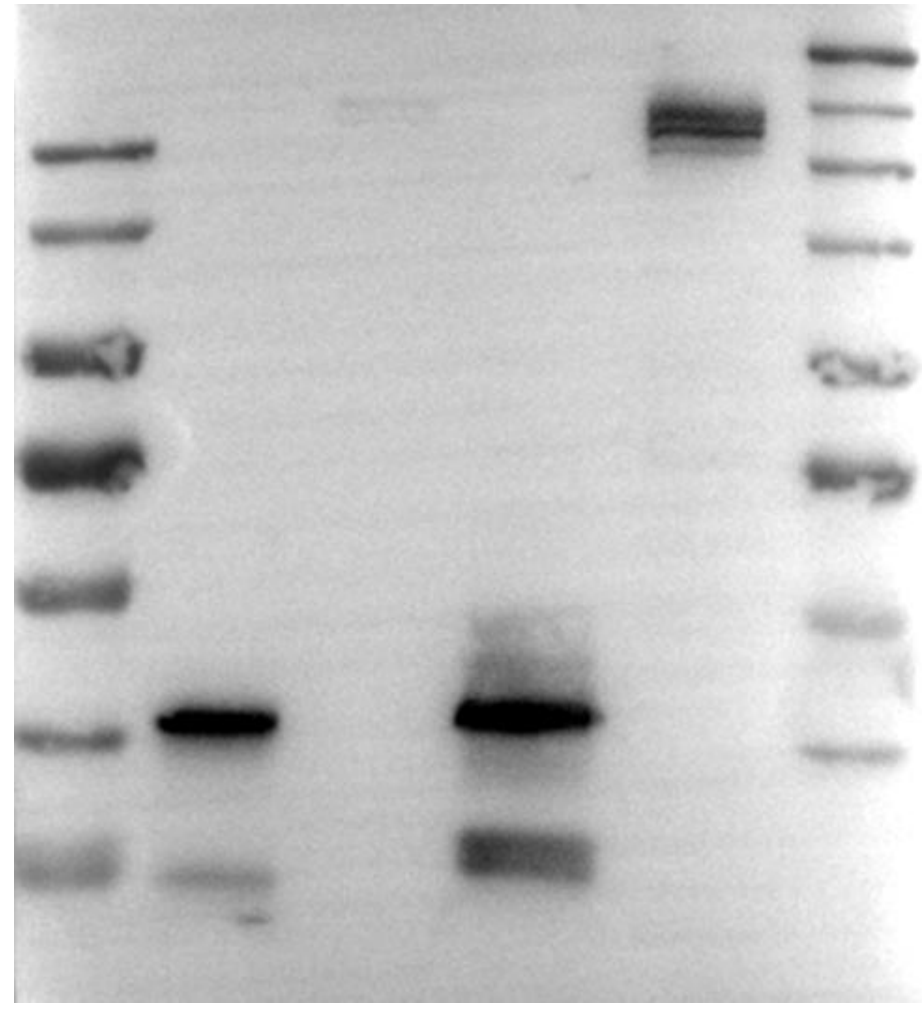

Unrelated samples

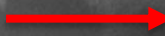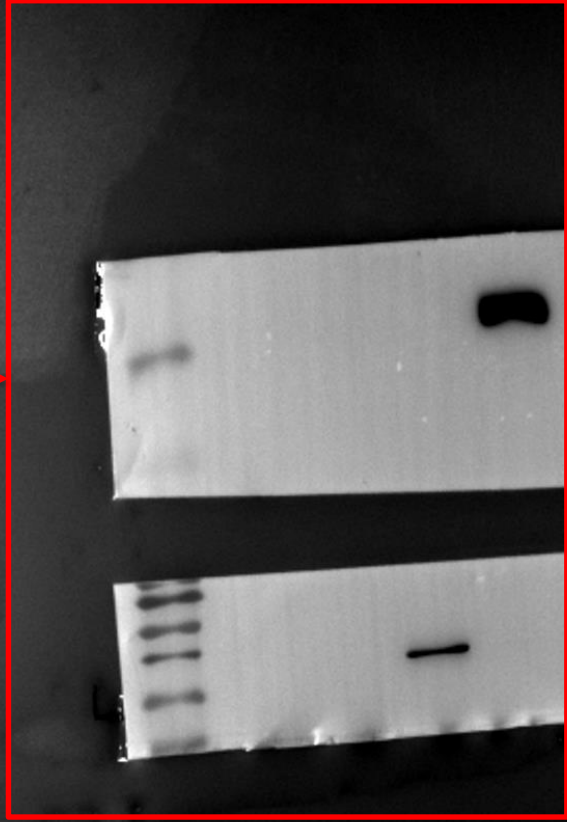

Emerin Cyto  
dCas9-Emerin cyto  
Emerin Nu  
dCas9-Emerin Nu

Histone

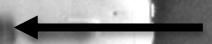

GAPDH

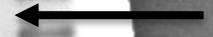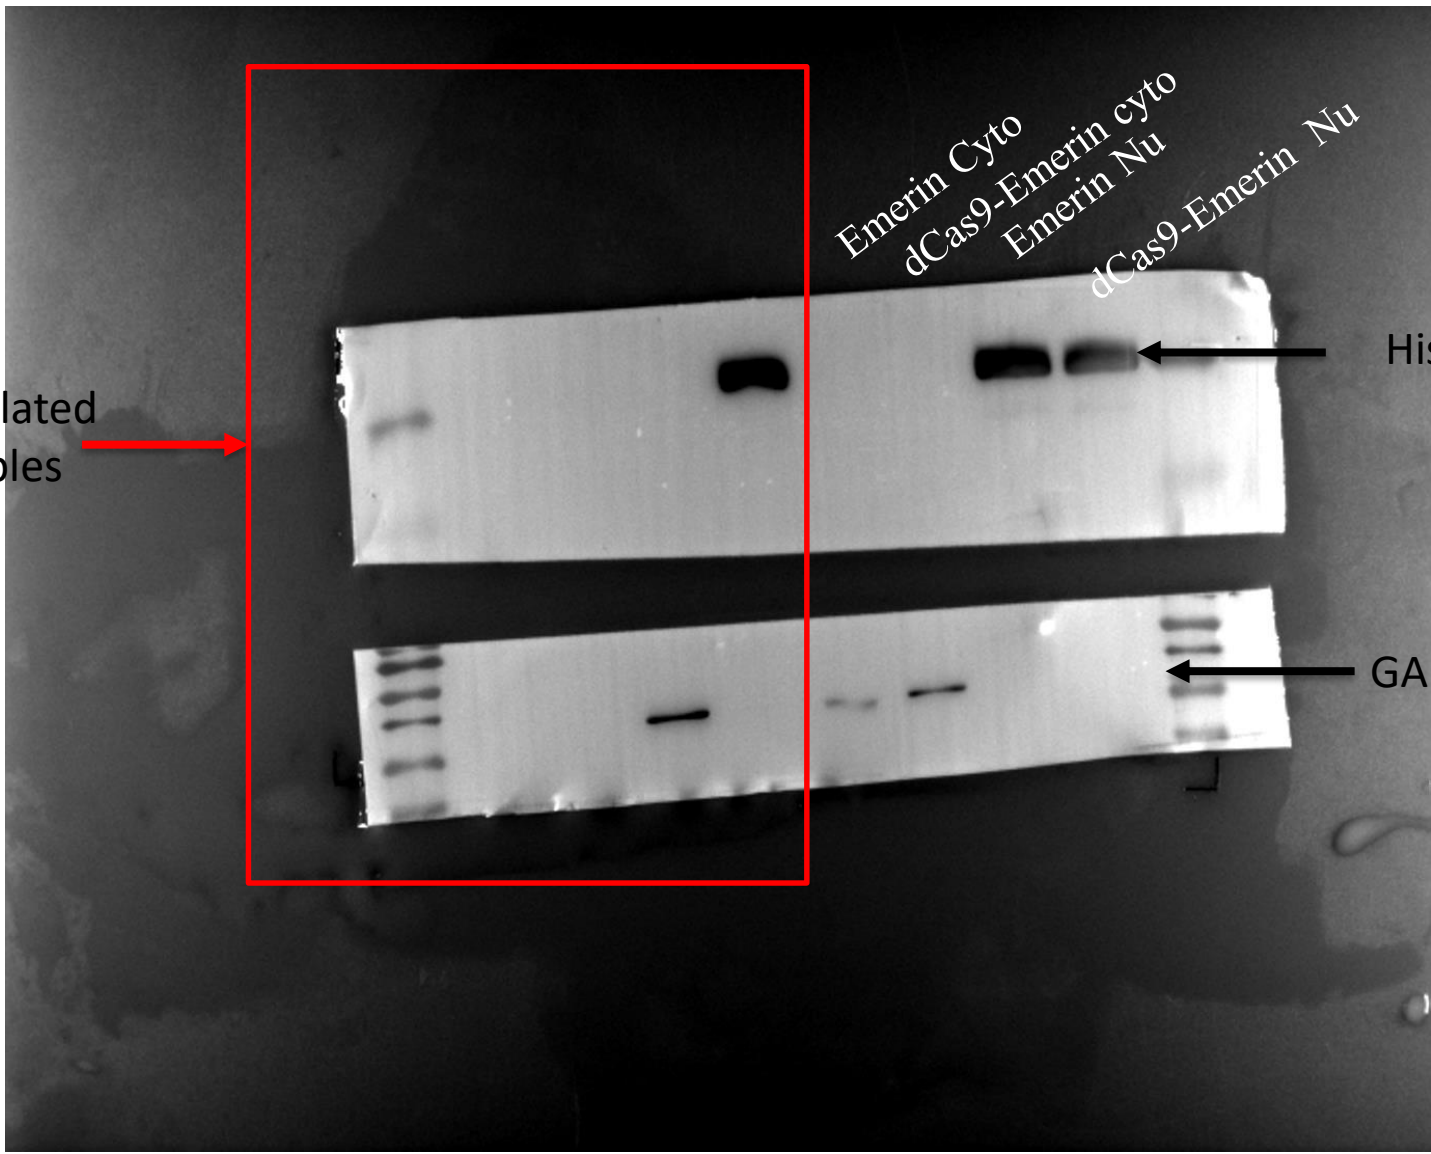

Supplement: supp [file elife-85412-supp-v1.zip]
