# Supplementary material for: A CRISPR-based rapid DNA repositioning strategy and the early intranuclear life of HSV-1
Source: eLife journal article supplement (doi:10.7554/elife.85412), 2023-09-13

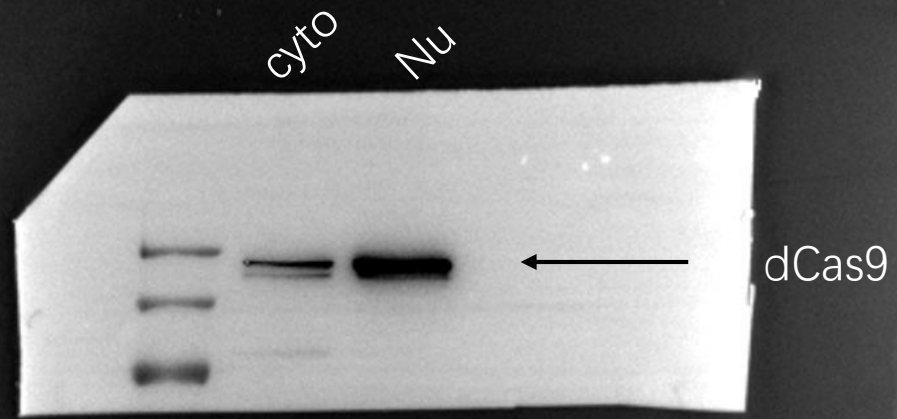

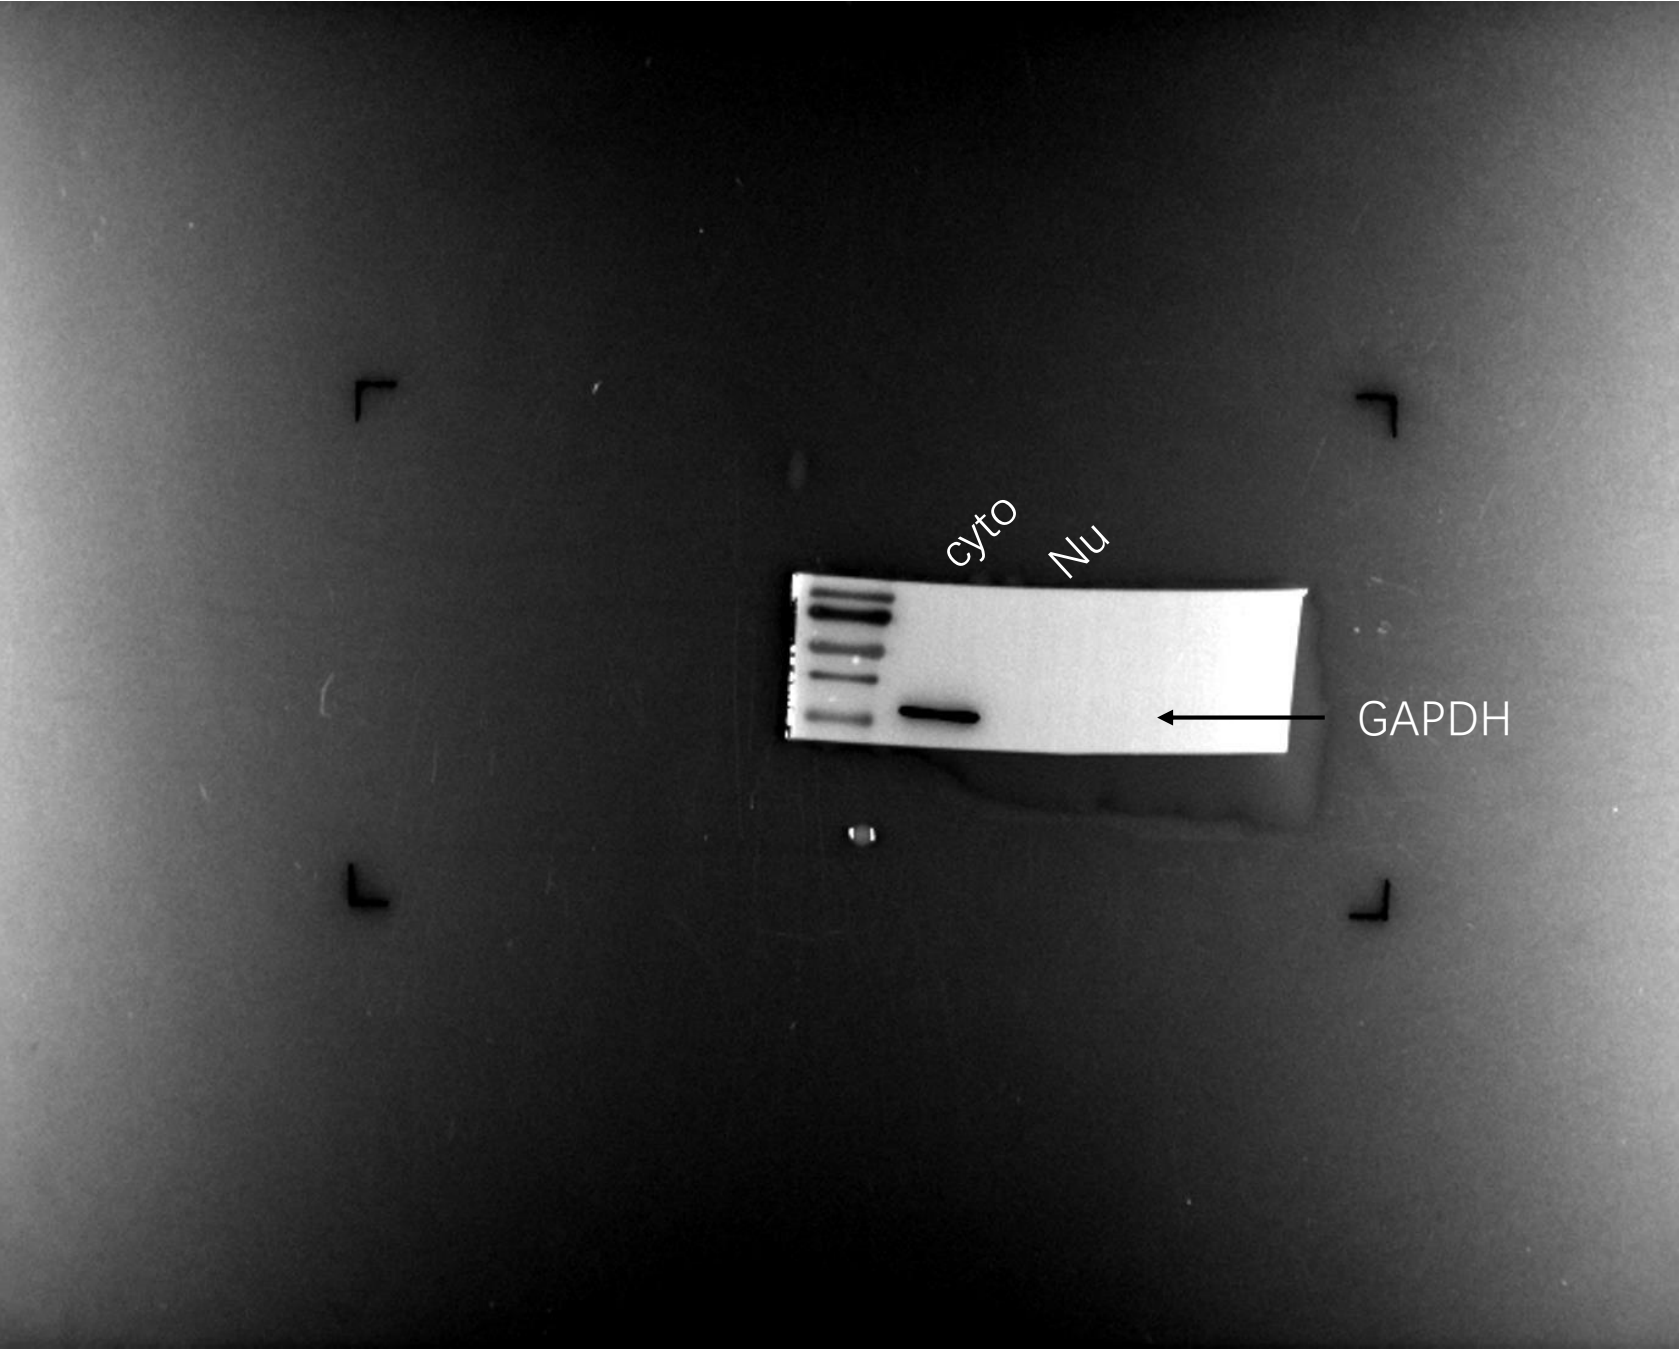

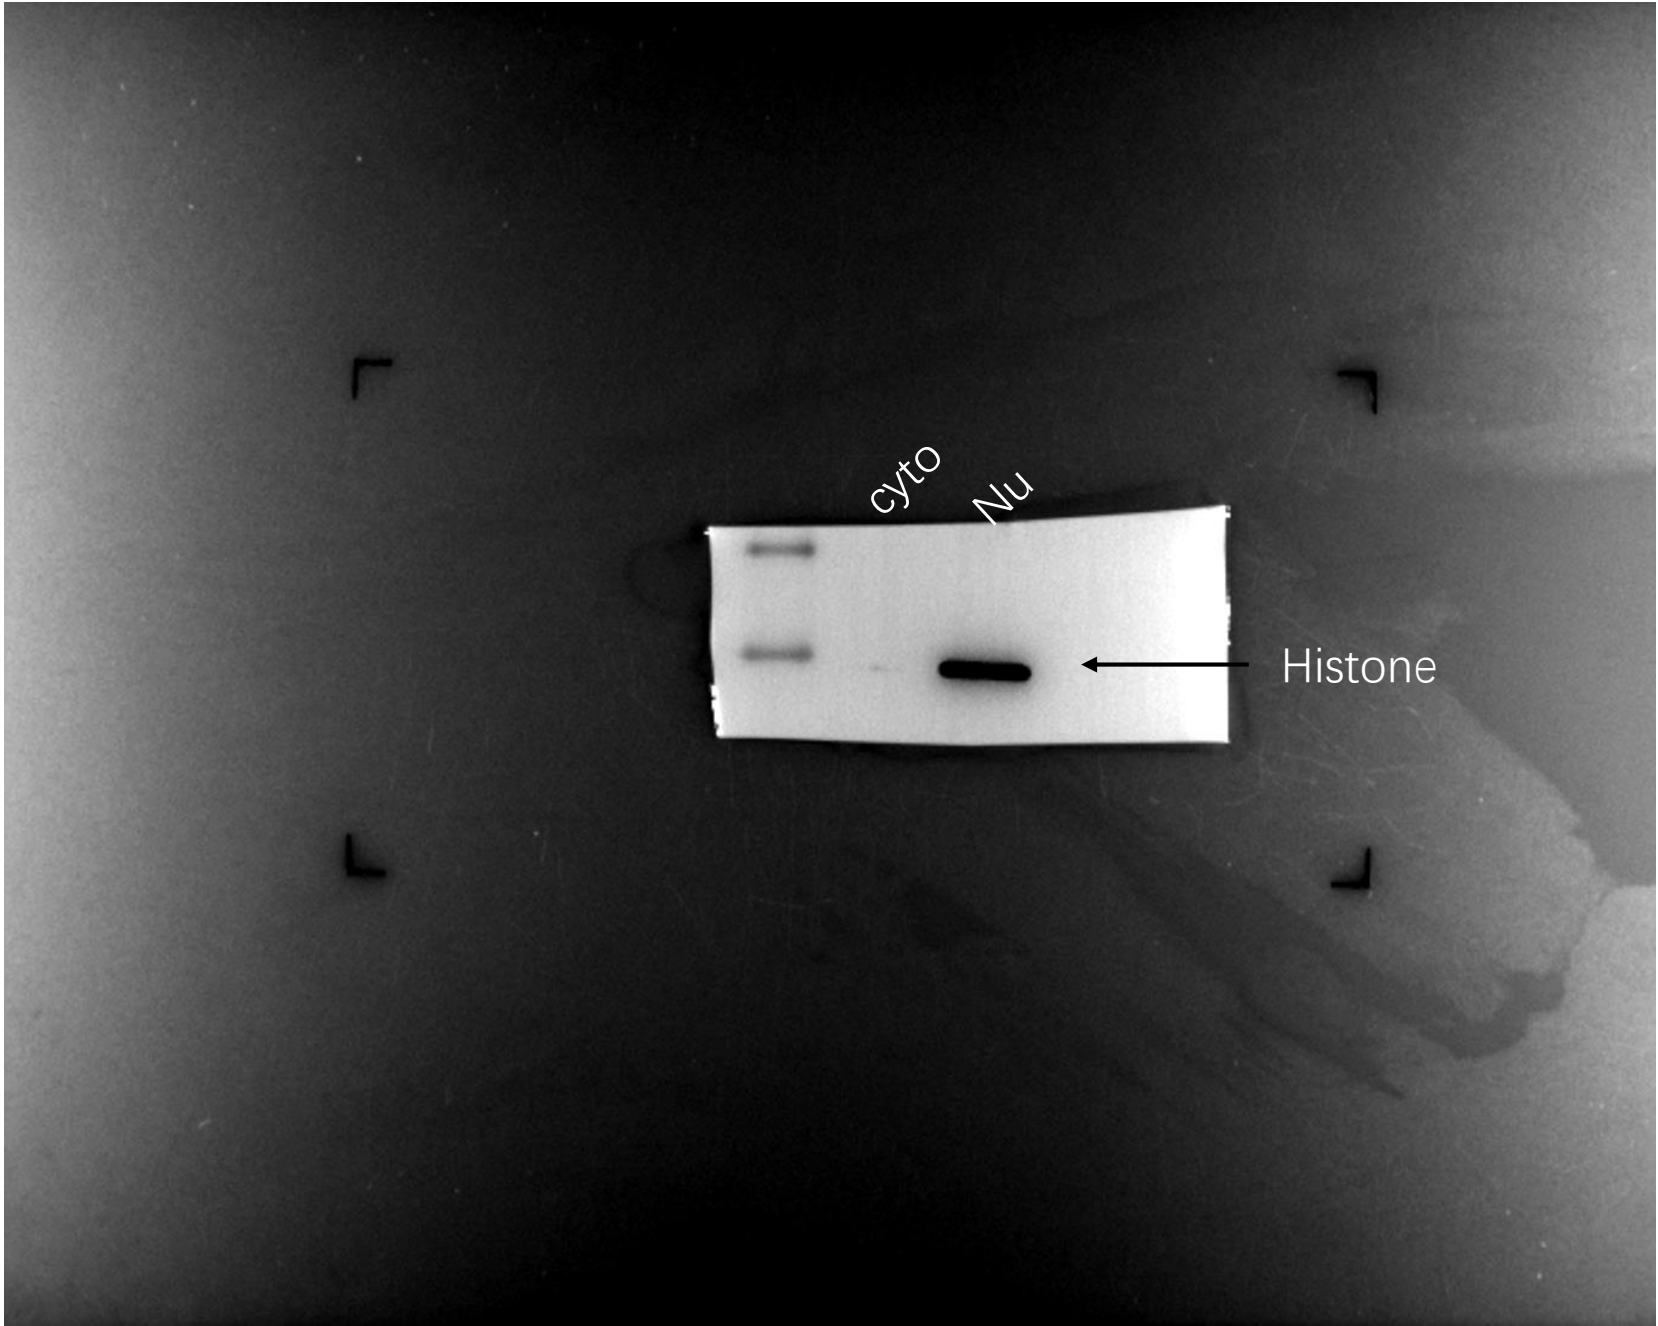

Supplement: supp [file elife-85412-supp-v1.zip]
