# Supplementary material for: A CRISPR-based rapid DNA repositioning strategy and the early intranuclear life of HSV-1
Source: eLife journal article supplement (doi:10.7554/elife.85412), 2023-09-13
Supplement: supp [file elife-85412-supp-v1.zip]

Unrelated  
sample

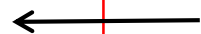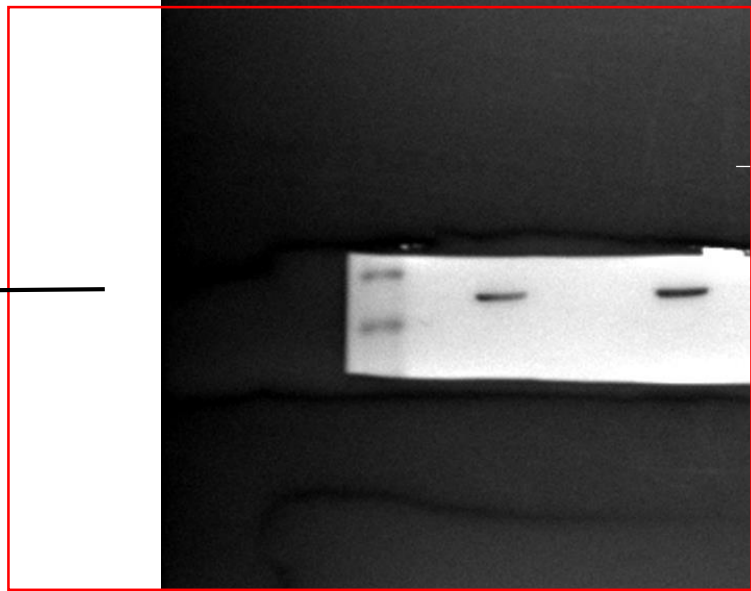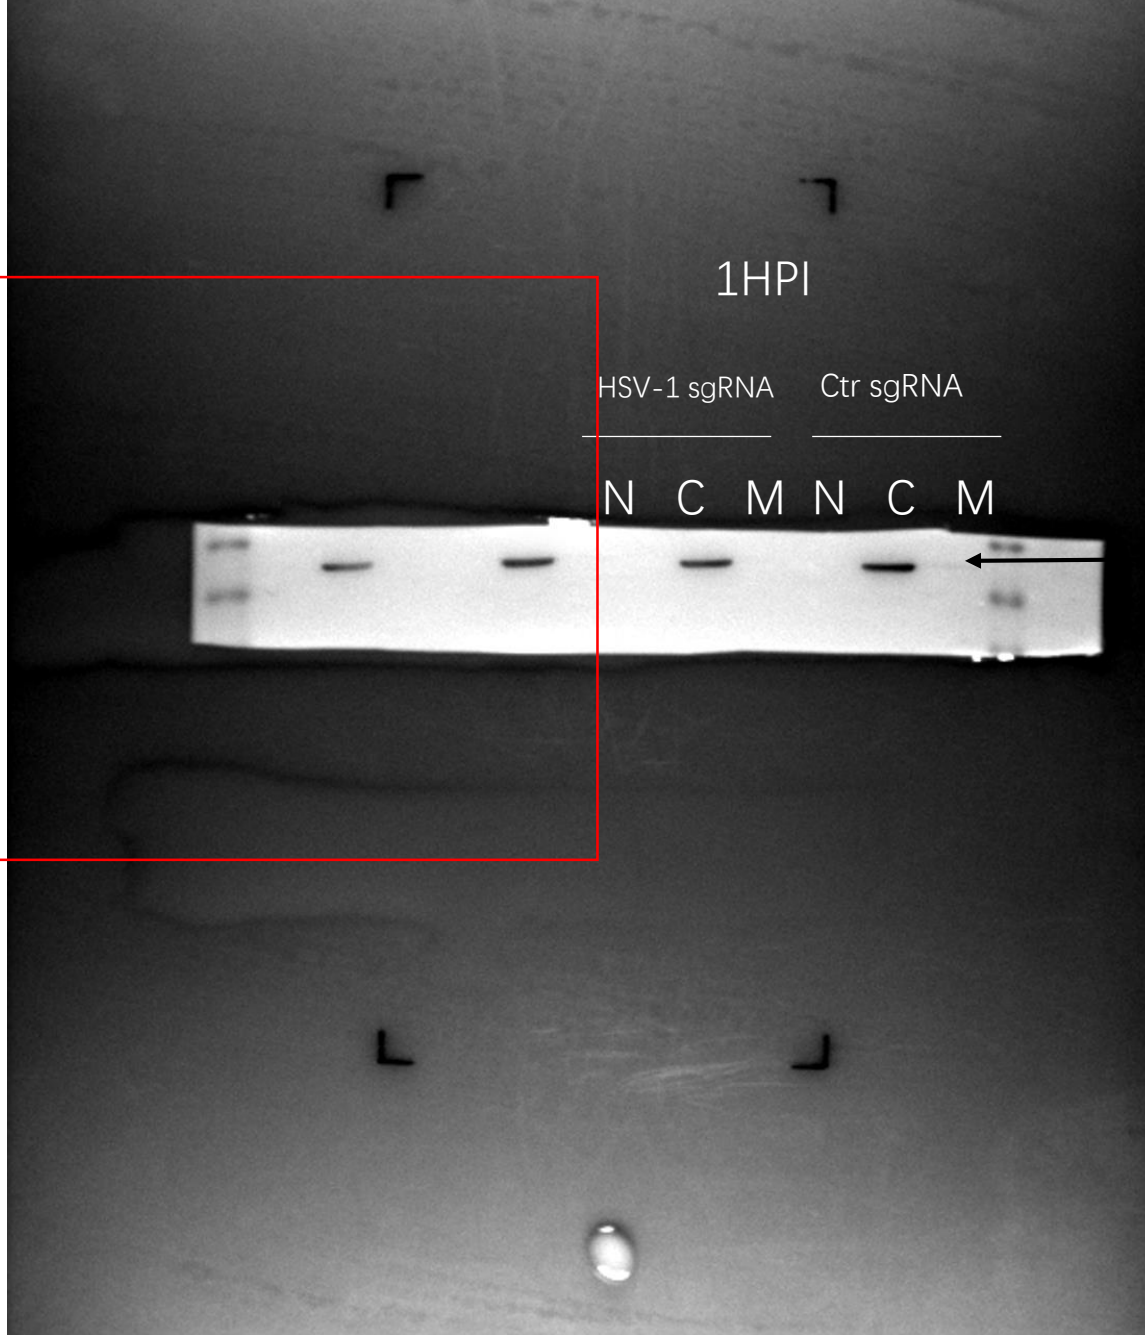

GAPDH

2HPI

HSV-1 sgRNA    Ctr sgRNA

N   C   M   N   C   M

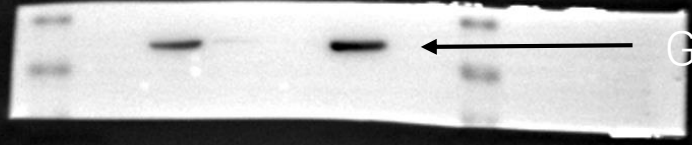

GAPDH

1HPI

HSV-1 sgRNA      Ctr sgRNA

N C M N C M

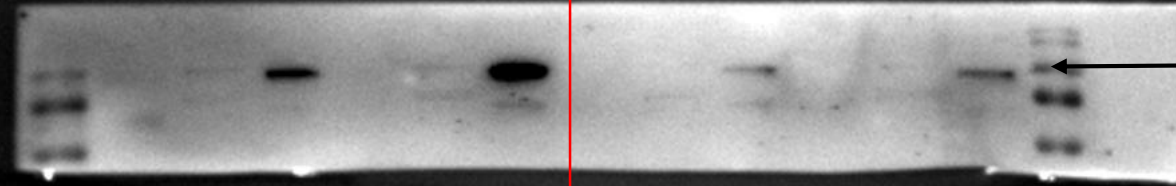

E-Cadherin

Unrelated sample

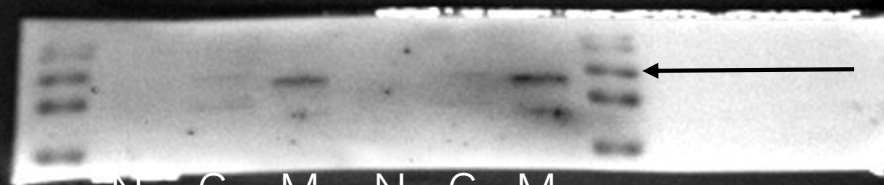

E-Cadherin

N C M N C M

HSV-1 sgRNA      Ctr sgRNA

2HPI

1HPI

HSV-1 sgRNA      Ctr sgRNA

N C M N C M

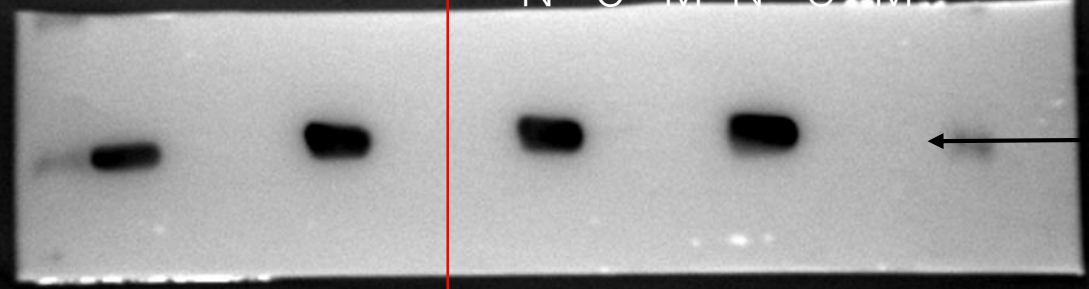

Histone

Unrelated sample

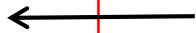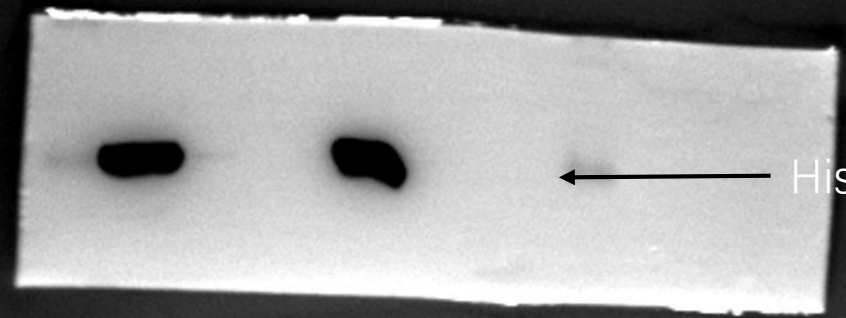

Histone

N C M N C M

HSV-1 sgRNA      Ctr sgRNA

2HPI
