# Supplementary material for: A CRISPR-based rapid DNA repositioning strategy and the early intranuclear life of HSV-1
Source: eLife journal article supplement (doi:10.7554/elife.85412), 2023-09-13

$\Delta$ ICP0 virus

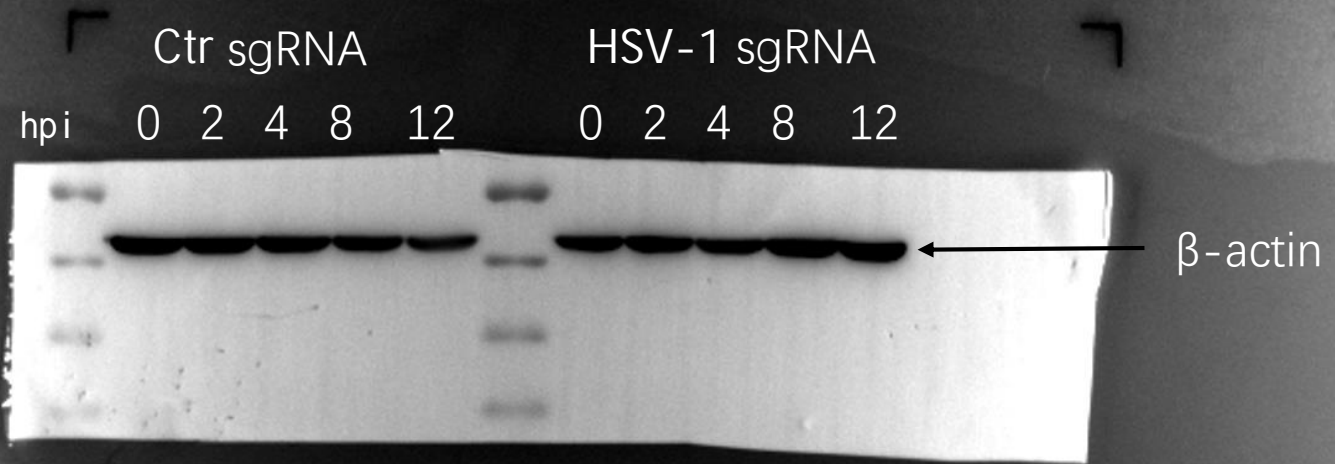

$\Delta$ ICP0 virus

Ctr sgRNA

HSV-1 sgRNA

hpi 0 2 4 8 12

0 2 4 8 12

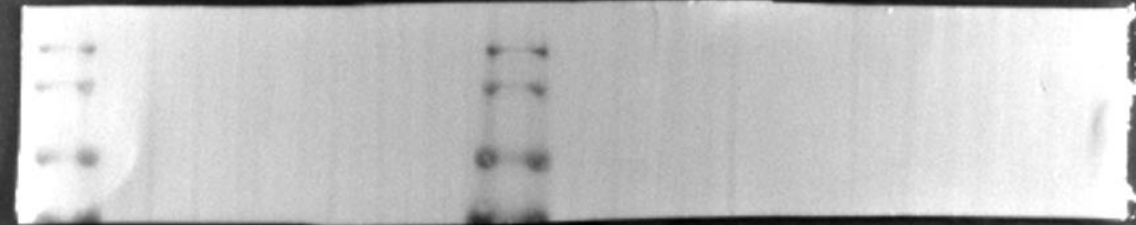

ICP0

$\Delta$ ICP0 virus

Ctrl sgRNA

HSV-1 sgRNA

hpi

0 2 4 8 12

0 2 4 8 12

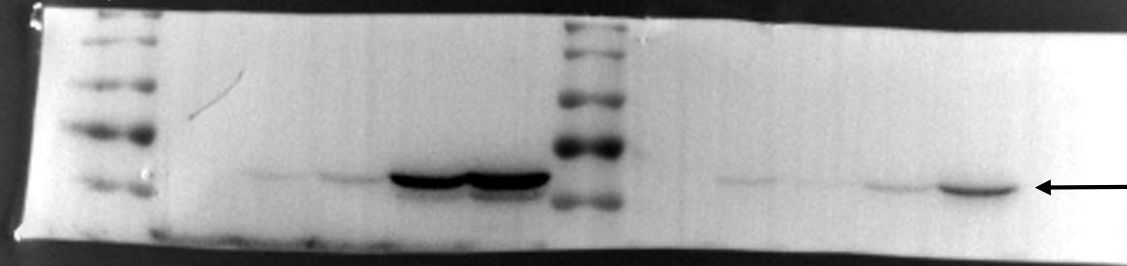

ICP27

$\Delta$ ICP0 virus

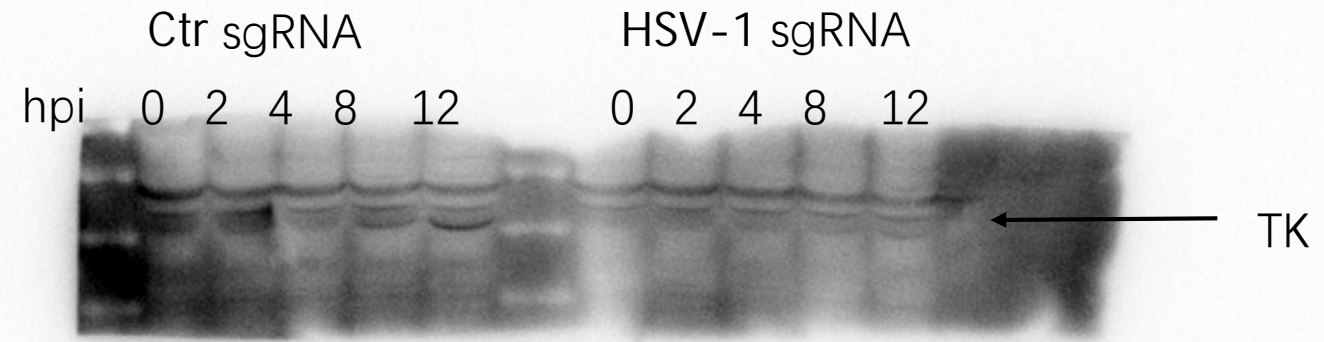

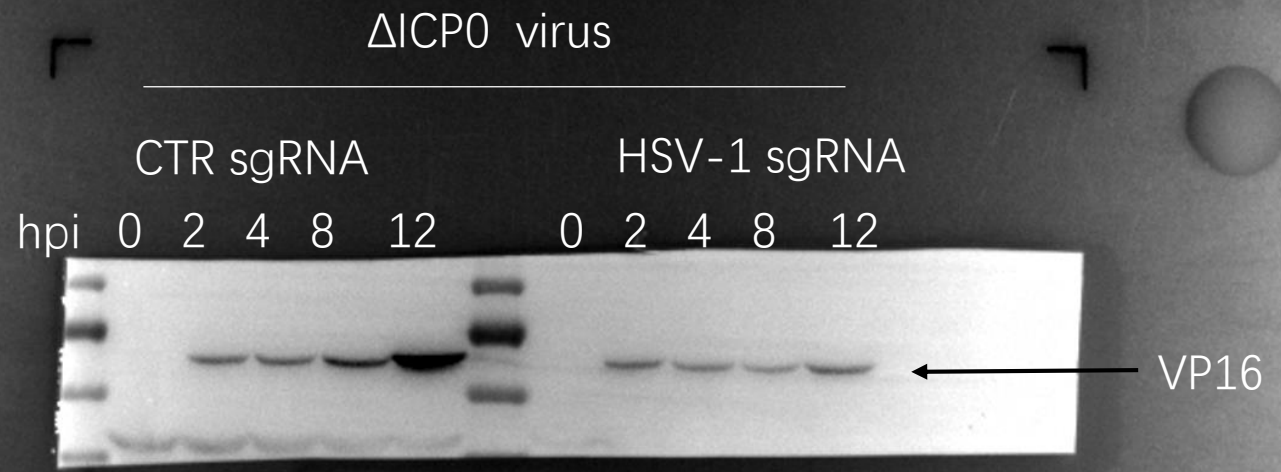

Supplement: supp [file elife-85412-supp-v1.zip]
