# Supplementary material for: A CRISPR-based rapid DNA repositioning strategy and the early intranuclear life of HSV-1
Source: eLife. 2023 Sep 13;12:e85412. doi: 10.7554/eLife.85412 (PMC10522339; doi:10.7554/eLife.85412)
Supplement: Supplementary file 1. — The contents of this Excel file provide information about the repeat numbers of crucial experiments conducted during the research. [file elife-85412-supp1.xlsx]

## Sheet: Sheet1
	The replication times of the experiment
		Experiment	virus type	MOI	time collected		times
Figure1	F	BAC-HSV-1					>3
	H	telomere					>3
Figure2	A	growth curve	HSV-1(F)	1	0,1,2,3,5,7,16,18,24,48hpi		>3
	B	FISH	HSV-1(F)	5	3hpi		>3
	C	Plaque	HSV-1(F)	0.1,1,5,20	12hpi		>3
	D	qPCR	HSV-1(F)	5（on ice）	1,0.17,0.5,1,2,3,5,9hpi		>3
	E	WB	HSV-1(F)	5	0,2,4,8,12hpi		>3
	F	ChIP	HSV-1(F)	1(4℃)	0.5hpi		>3
	G	ChIP	HSV-1(F)	1(4℃)	5,15,30,60min		>3
	H	HDAC inhibitor	HSV-1(F)	1(4℃)	0,0.25,0.5,1,2,3hpi		3
Figure3	B	IF	HSV-1(F)	5	3
	C	FISH	HSV-1(F)	5(4℃)	0.5,1,2hpi electroporation, 5min
	D
	E	Plaque	HSV-1(F)	1(4℃)	0，0.5，1，2hpi electroporation，12hpi		>3
	F	growth curve	HSV-1(F)	1(4℃)	0,4,8,12hpi		>3
	G	IF(1h electro)	HSV-1(F)	1(4℃)	6hpi
Figure4	A	qPCR(1h electro)	HSV-1	1(4℃)	1,1.5,2,2,5,3,4,5,7,9hpi		>3
	B	WB(1h electro)	HSV-1	1(4℃)	2,4,8,12hpi		3
	C	qPCR(1h electro)	HSV-1	1(4℃)	1,3,5,9hpi	PAA(500μg/ml)	>3
	D	WB(1h electro)	HSV-1	1(4℃)	1,2,3,4,5hpi		>3
	E	IF	HSV-1	1(4℃)	1H electroporation，1.5hpi
	F	overexpression ICP0,Plaque	HSV-1	1(4℃)	0，0.5，1，2hpi electroporation，24hpi		>3
	G	overexpression ICP0,Plaque	HSV-1	1(4℃)	1hpi electroporation，24hpi		3
	H	overexpression ICP0,Plaque	ΔICP0	1(4℃)	0.5，1，2hpi electroporation，24hpi		>3
	I	qPCR	ΔICP0	1(4℃)	1hpi electroporation，1，1.5，2，3，5，8hpi		>3
supplementary Figure 1	G	CCK8					1
	H	plasmid reposition					>3
supplementary Figure 2	A	Count	HSV-1	5	0.5,1,1.5,2hpi
	D	5 sgRNAs	HSV-1	1	24hpi
	E	plaque	HSV-1	1	24hpi		>3
	F	plaque	HSV-1	1	24hpi		>3
	G		R8515 HSV-1	1	24hpi		3
	H	qPCR	HSV-1	1,5,20	0,0.17,0.25,0.5,1,1.5,2hpi		>3
	I	WB+qPCR	HSV-1	1(4℃)	1，2hpi		>3
	J	IF	HSV-1	5	4,6,8hpi		>3
	L						>3
	M	ChIP	HSV-1	1(4℃)	5,15,30,60min		2
	N	different inhibitor	HSV-1	1(4℃)	3hpi		>3
supplementary Figure 3	A	IF(ICP8-EMERIN)	HSV-1	5	0,1,3,5hpi		2
	B	IF	HSV-1	5	0,1,2,3,6hpi		3
	C	IF	HSV-1	5	1,5,16hpi		2
	D	dCas9-	HSV-1	1(4℃)	0，0.5，1，2hpi electroporation，12hpi		>3
supplementary Figure 4	A	PAA treatment	HSV-1	0.1(4℃)	0,3,6,9,12,24hpi		>3
	B	overexpression ICP0andPlaque	HSV-1	1(4℃)	1hpi electroporation，24hpi		3
	C	plaque	ΔICP0	0.01,0.1,1,5	24hpi		>3
	D	growth curve	ΔICP0	1	0,2,4,6,8,12,24,48hpi		3
	E	qPCR	ΔICP0	1(4℃)	0,0.17,0.5,1,2,3,5,6,7,9hpi		>3
	F	WB	ΔICP0	1	0,2,4,8,12hpi		>3
	G	plaque	ΔICP0	1	1hpi electroporation，24hpi		>3
